# Supplementary material for: Cross-ancestry analyses identify new genetic loci associated with 25-hydroxyvitamin D
Source: PLoS Genet. 2023 Nov 14;19(11):e1011033. doi: 10.1371/journal.pgen.1011033 (PMC10684098; doi:10.1371/journal.pgen.1011033)
Supplement: S2 Appendix — (XLSX) [file pgen.1011033.s002.xlsx]

## Sheet: A
Table A. 25OHD distributions
25OHD distributions (nmol/L) across four ancestry groups (plotted in Figure A in S1 Appendix). Abbreviations: AFR, African; EAS, East Asian; EUR, European; s.d., standard deviation; SAS, South East Asian.
	Min.	1st.Qu.	Median	Mean	3rd.Qu.	Max.	s.d.	N
EUR	10	33.4	47.8	49.46	63.1	340	20.97	421867
SAS	10	17	25.1	29.4	37.7	297	16.78	9983
AFR	10	21.8	30.6	33.87	42.4	123	16.16	8306
EAS	10	23.7	32.5	35.45	44.4	141	15.52	2279

## Sheet: B
Table B. Association between ancestry group and month of assessment
Genetically-inferred ancestry groups as predictors of month of testing. Abbreviations: AFR, African; EAS, East Asian; EUR, European; SAS, South East Asian.
(a) Proportion of individuals assessed in each month
Ancestry	Jan	Feb	Mar	Apr	May	Jun	Jul	Aug	Sep	Oct	Nov	Dec
EUR (N=421867)	0.068441	0.0790131	0.0982371	0.087978	0.103438	0.101494	0.085508	0.0765763	0.074469	0.0861362	0.0831874	0.0555222
SAS (N=9983)	0.054092	0.0542923	0.0828408	0.0716218	0.105479	0.130822	0.11179	0.0822398	0.059401	0.0887509	0.0971652	0.0615046
AFR (N=8306)	0.0640501	0.0632073	0.0941488	0.0748856	0.126294	0.129906	0.0833133	0.0646521	0.0451481	0.0839152	0.101613	0.0688659
EAS (N=2279)	0.0662571	0.0737165	0.0921457	0.0776656	0.116718	0.129443	0.0820535	0.0693287	0.0574814	0.0838087	0.0978499	0.0535323
(b) Multinomial logistic model
	Estimate				P-value
	(Intercept)	SAS	AFR	EAS	SAS	AFR	EAS
Feb	0.144	-0.14	-0.157	-0.037	0.023	0.011	0.743
Mar	0.361	0.065	0.024	-0.032	0.245	0.674	0.767
Apr	0.251	0.03	-0.095	-0.092	0.606	0.112	0.406
May	0.413	0.255	0.266	0.153	0	0	0.134
Jun	0.394	0.489	0.313	0.276	0	0	0.006
Jul	0.223	0.503	0.04	-0.009	0	0.488	0.936
Aug	0.112	0.307	-0.103	-0.067	0	0.096	0.557
Sep	0.084	0.009	-0.434	-0.227	0.877	0	0.058
Oct	0.23	0.265	0.04	0.005	0	0.488	0.963
Nov	0.195	0.391	0.266	0.195	0	0	0.065
Dec	-0.209	0.338	0.282	-0.004	0	0	0.975
(c) Linear model
	Estimate	SE	P-value
(Intercept)	6.323	0.005	0
SAS	0.356	0.033	6e-27
AFR	0.15	0.036	3e-05
EAS	0.041	0.069	0.552

## Sheet: C
Table C. Number of individuals by self-reported skin colour
Sefl-repoted skin was obatined from UKB data field 1717 (answers from the initial assessment visit). The table shows the number of individuals that reported "very fair", "fair". "light olive", "dark olive", "brown" or "black" skin in each genetically-inferred ancestry group.
Ancestry	Very fair	Fair	Light olive	Dark Olive	Brown	Black	Total
EUR	32702	293065	76858	6800	2363	38	411826
SAS	122	1280	1889	753	5347	60	9451
AFR	35	257	153	240	4034	3269	7988
EAS	25	461	728	148	547	6	1915

## Sheet: D
Table D. 25OHD association with potential confounders (individually fitted)
Associations with potential confounders were tested with linear regression (RINT 25OHD dependent variable for continuous and categorical independent variables). Assessment month, assessment centre, use of supplements (four levels: 1. never used, 2. vitamin D, 3. other supplements, 4. no information) and genotyping batch were fitted as categorical covariates. (a) shows results for full model (i.e.…
(a) 25OHD association with potential confounders (individually fitted)
	beta				r2				P-value
Covariate	EUR	SAS	AFR	EAS	EUR	SAS	AFR	EAS	EUR	SAS	AFR	EAS
Age	0.01	0.017	0.022	0.025	0.0067	0.022	0.032	0.039	0	1.1e-49	7.06e-60	1.06e-21
Assessment centre	-	-	-	-	0.031	0.033	0.018	0.018	0	6.16e-60	4.86e-22	0.00349
Assessment month	-	-	-	-	0.15	0.036	0.045	0.09	0	8.83e-71	5.42e-76	4.88e-40
BMI	-0.036	-0.03	-0.009	-0.032	0.03	0.018	0.0023	0.013	0	7.32e-40	1.25e-05	5e-08
Genotyping batch	-	-	-	-	0.00093	0.012	0.012	0.044	5.31e-35	0.0949	0.384	0.323
Sex					3.5e-07	0.013	0.0045	0.0034	0.701	4.65e-30	9.85e-10	0.00551
Supplements ever	-	-	-	-	0.016	0.035	0.021	0.034	0	4.99e-77	1.31e-38	8.11e-17
Time spent outdoors (summer)	0.054	0.009	0.005	0.039	0.016	0.00044	0.00017	0.0074	0	0.0468	0.269	0.000117
Time spent outdoors (winter)	0.049	-0.002	0.004	0.028	0.0076	2e-05	0.00011	0.0022	0	0.678	0.374	0.0362
Use of sun protection	0.051	0.142	0.051	0.031	0.0022	0.021	0.0025	0.001	6.02e-200	6.87e-45	6.33e-06	0.133
wPC1	8.773	-7.641	1.311	7.126	0.00042	0.0067	0.0011	0.022	9.47e-41	2.73e-16	0.00308	7.68e-13
wPC10	3.55	-3.101	0.799	0.264	0.00023	0.00097	9.1e-05	2.9e-05	8.97e-23	0.00184	0.384	0.797
wPC2	-38.884	17.397	12.53	2.08	0.0069	0.064	0.02	0.0018	0	6.22e-145	7.98e-39	0.0404
wPC3	1.9	-1.719	1.764	4.528	0.00011	0.00043	0.00044	0.015	1.17e-11	0.0389	0.0564	6.01e-09
wPC4	-0.286	3.622	-2.186	0.856	1.5e-06	0.002	0.00072	0.00032	0.424	6.8e-06	0.0146	0.397
wPC5	0.216	-1.712	7.762	-1.78	5.1e-06	0.00034	0.012	0.0013	0.142	0.0643	9.26e-24	0.0864
wPC6	-5.578	3.783	3.159	-0.875	0.00013	0.0014	0.0015	0.00033	3.27e-13	0.000169	0.000462	0.389
wPC7	0.343	-1.867	-5.352	1.454	4.4e-06	0.00034	0.0045	0.00087	0.172	0.0655	1e-09	0.159
wPC8	2.051	-1.528	1.055	-0.11	2.3e-05	0.00023	0.00016	5e-06	0.00196	0.134	0.248	0.915
wPC9	-1.864	2.025	-1.858	-1.971	0.00011	0.0004	0.0005	0.0016	1.42e-11	0.0446	0.0412	0.0557
(b) 25OHD association with potential confounders (individually fitted) – comparison of each categorical level with reference level
		beta				P-value
Covariate	level	EUR	SAS	AFR	EAS	EUR	SAS	AFR	EAS
Assessment centre	11001 (ref)	0.127	-0.168	-0.032	-0.089	3.09504e-45	0.00308336	0.488089	0.422964
Assessment centre	11002 vs ref	0.223	0.613	0.179	0.192	1.00747e-70	4.72334e-11	0.104503	0.224131
Assessment centre	11003 vs ref	-0.274	-0.003	-0.311	-0.133	2.17181e-118	0.97896	0.00329052	0.443152
Assessment centre	11004 vs ref	-0.445	-0.118	-0.412	0.018	0	0.213952	0.0151667	0.920652
Assessment centre	11005 vs ref	-0.643	-0.156	-0.315	-0.124	0	0.261173	0.0825476	0.444611
Assessment centre	11006 vs ref	-0.266	0.171	0.147	0.154	8.1173e-115	0.114376	0.269744	0.463574
Assessment centre	11007 vs ref	-0.006	0.222	0.169	0.035	0.597104	0.00246663	0.0263109	0.787451
Assessment centre	11008 vs ref	-0.099	-0.029	0	0.101	1.86857e-19	0.700963	0.998188	0.507491
Assessment centre	11009 vs ref	-0.251	0.049	-0.18	-0.094	2.63822e-126	0.586846	0.160768	0.549811
Assessment centre	11010 vs ref	-0.155	-0.023	-0.074	-0.114	2.05569e-51	0.73531	0.25671	0.438796
Assessment centre	11011 vs ref	0.079	0.457	0.034	0.351	1.63799e-14	5.09088e-09	0.635391	0.0138206
Assessment centre	11012 vs ref	-0.263	0.355	0.15	0.15	3.14996e-84	2.96058e-06	0.00636132	0.258983
Assessment centre	11013 vs ref	-0.013	0.246	0.076	0.325	0.213967	0.00109472	0.274072	0.0354421
Assessment centre	11014 vs ref	-0.057	0.28	-0.088	-0.03	1.43386e-07	0.00116227	0.255037	0.857782
Assessment centre	11016 vs ref	-0.126	0.475	-0.085	-0.032	7.31455e-32	8.27767e-08	0.371252	0.824488
Assessment centre	11017 vs ref	0.126	0.124	0.003	0.123	7.28678e-28	0.227234	0.983672	0.546546
Assessment centre	11018 vs ref	-0.074	0.244	0.148	0.146	4.89722e-11	4.35048e-05	0.00821923	0.229739
Assessment centre	11020 vs ref	-0.236	0.275	0.1	0.153	2.67903e-95	1.02722e-05	0.0491665	0.218538
Assessment centre	11021 vs ref	-0.234	-0.15	-0.201	0.004	1.18485e-92	0.0183732	0.000241518	0.977192
Assessment centre	11022 vs ref	-0.201	-0.022	-0.525	-0.82	2.38015e-16	0.92625	0.291727	0.0738373
Assessment centre	11023 vs ref	0.406	0.899	1.237	1.014	1.63288e-21	0.361579	0.212957	0.154678
Assessment month	1 (ref)	-0.45	-0.238	-0.313	-0.304	0	1.74251e-08	1.73924e-13	9.58859e-05
Assessment month	10 vs ref	0.741	0.28	0.45	0.569	0	1.91897e-07	1.3915e-15	5.17487e-08
Assessment month	11 vs ref	0.424	0.08	0.215	0.189	0	0.131475	7.02207e-05	0.0604285
Assessment month	12 vs ref	0.22	0.018	0.167	-0.049	3.18113e-161	0.757195	0.0046148	0.675237
Assessment month	2 vs ref	-0.044	-0.014	0.033	-0.12	2.64961e-09	0.816216	0.585233	0.263974
Assessment month	3 vs ref	-0.034	0.068	0.079	0.019	1.56775e-06	0.211353	0.148423	0.854787
Assessment month	4 vs ref	0.089	0.064	0.153	0.047	8.02879e-35	0.254256	0.00819723	0.655359
Assessment month	5 vs ref	0.351	0.245	0.285	0.223	0	2.42706e-06	4.23331e-08	0.0223305
Assessment month	6 vs ref	0.731	0.341	0.501	0.501	0	1.20672e-11	5.12084e-22	1.79328e-07
Assessment month	7 vs ref	0.942	0.439	0.626	0.701	0	1.69819e-17	1.70786e-28	2.53656e-11
Assessment month	8 vs ref	0.992	0.484	0.565	0.711	0	7.40928e-19	4.37104e-21	7.60258e-11
Assessment month	9 vs ref	0.956	0.606	0.682	0.803	0	4.59695e-25	6.1445e-25	2.56722e-12
Genotyping batch	-1 vs ref	-0.014	-0.335	-	-	0.538583	0.617248	-	-
Genotyping batch	-10 vs ref	0.005	-0.233	-	-	0.822849	0.676263	-	-
Genotyping batch	-11 (ref)	-0.068	1.17	0.187	-0.188	1.18175e-05	0.00884837	0.102578	0.850627
Genotyping batch	-2 vs ref	-0.001	-1.45	-	-	0.952937	0.0304973	-	-
Genotyping batch	-3 vs ref	0.044	0.464	-	-	0.0476396	0.578993	-	-
Genotyping batch	-4 vs ref	0.029	0.371	-	-	0.189256	0.557576	-	-
Genotyping batch	-5 vs ref	0.023	0.454	-	-	0.302541	0.678448	-	-
Genotyping batch	-6 vs ref	0.009	-0.818	-	-	0.691459	0.262388	-	-
Genotyping batch	-7 vs ref	0.044	-1.09	-	-	0.0458225	0.103907	-	-
Genotyping batch	-8 vs ref	0.046	-0.132	-	-	0.0374679	0.821481	-	-
Genotyping batch	-9 vs ref	0.021	0.062	-	-	0.34449	0.915014	-	-
Genotyping batch	1 vs ref	0.063	-1.213	-	-0.102	0.0039921	0.00797624	-	0.920948
Genotyping batch	10 vs ref	0.057	-1.092	-0.214	0.342	0.0104519	0.0166588	0.170268	0.7361
Genotyping batch	11 vs ref	0.075	-1.201	-0.156	0.052	0.000656902	0.00868946	0.355955	0.95925
Genotyping batch	12 vs ref	0.086	-1.208	-0.226	-0.019	8.78787e-05	0.00865284	0.140788	0.98515
Genotyping batch	13 vs ref	0.1	-1.166	-0.31	-0.294	5.49372e-06	0.0103884	0.0569603	0.775835
Genotyping batch	14 vs ref	0.077	-1.282	-0.393	0.006	0.000477128	0.00528877	0.0135759	0.994973
Genotyping batch	15 vs ref	0.041	-1.31	-0.088	-0.194	0.0641012	0.00424235	0.576114	0.850221
Genotyping batch	16 vs ref	0.108	-1.144	-0.304	0.332	1.23792e-06	0.0121861	0.0449711	0.742957
Genotyping batch	17 vs ref	0.09	-1.319	-0.125	0.105	5.27994e-05	0.0038883	0.420913	0.917796
Genotyping batch	18 vs ref	0.083	-1.094	0.001	-0.069	0.000191201	0.0171286	0.997183	0.945618
Genotyping batch	19 vs ref	0.092	-1.196	-0.295	0.54	3.9079e-05	0.0090839	0.0539576	0.597077
Genotyping batch	2 vs ref	0.097	-1.304	-0.016	0.1	1.26886e-05	0.00431201	0.919881	0.922393
Genotyping batch	20 vs ref	0.029	-1.106	-0.144	0.485	0.194648	0.0153635	0.347252	0.632548
Genotyping batch	21 vs ref	0.1	-1.167	-0.263	0.018	7.58669e-06	0.0105515	0.0763201	0.985456
Genotyping batch	22 vs ref	0.074	-1.176	-0.06	0.163	0.000877183	0.0100283	0.699214	0.872034
Genotyping batch	23 vs ref	0.09	-1.101	-0.114	0.459	5.10003e-05	0.0157391	0.479446	0.650596
Genotyping batch	24 vs ref	0.033	-1.02	-0.094	0.418	0.133107	0.0259491	0.576113	0.681608
Genotyping batch	25 vs ref	0.078	-1.212	-0.217	0.054	0.000420368	0.00793714	0.155755	0.957545
Genotyping batch	26 vs ref	0.093	-1.267	-0.216	-0.075	2.76217e-05	0.00557217	0.1544	0.942374
Genotyping batch	27 vs ref	0.113	-1.041	-0.109	0.212	3.7564e-07	0.022658	0.483005	0.834626
Genotyping batch	28 vs ref	0.06	-1.083	-0.115	0.187	0.00658641	0.0185916	0.476261	0.854704
Genotyping batch	29 vs ref	0.037	-1.014	-0.277	0.063	0.0976032	0.0273955	0.0801416	0.951279
Genotyping batch	3 vs ref	0.072	-1.138	-0.145	0.198	0.00114653	0.0128245	0.354943	0.846035
Genotyping batch	30 vs ref	0.065	-1.199	-0.398	0.383	0.00336391	0.00873684	0.0113847	0.709623
Genotyping batch	31 vs ref	0.06	-1.145	-0.017	0.442	0.00644027	0.0122222	0.915729	0.664542
Genotyping batch	32 vs ref	0.13	-1.233	-0.175	0.324	4.15198e-09	0.00703134	0.263114	0.752968
Genotyping batch	33 vs ref	0.083	-0.987	-0.213	0.142	0.000185859	0.0321332	0.161593	0.888998
Genotyping batch	34 vs ref	0.142	-1.115	-0.159	0.263	1.38953e-10	0.0152332	0.342169	0.796628
Genotyping batch	35 vs ref	-0.02	-1.239	-0.463	0.306	0.367292	0.00649964	0.00232222	0.763509
Genotyping batch	36 vs ref	0.092	-1.125	-0.197	0.702	3.4648e-05	0.013988	0.230048	0.491441
Genotyping batch	37 vs ref	0.052	-1.225	-0.247	0.18	0.0183054	0.00733335	0.11083	0.860066
Genotyping batch	38 vs ref	0.045	-1.215	-0.213	-0.198	0.0449886	0.00773836	0.181513	0.846133
Genotyping batch	39 vs ref	0.071	-1.174	0.001	0.236	0.00138984	0.0105825	0.995359	0.816509
Genotyping batch	4 vs ref	0.074	-1.204	-0.343	0.195	0.000839171	0.00851461	0.0262427	0.84824
Genotyping batch	40 vs ref	0.062	-1.211	-0.186	0.19	0.00497753	0.00817364	0.248046	0.85281
Genotyping batch	41 vs ref	0.114	-1.293	-0.05	0.348	3.09297e-07	0.00469581	0.744231	0.731458
Genotyping batch	42 vs ref	0.127	-1.002	-0.05	0.391	1.1917e-08	0.0283397	0.754833	0.699414
Genotyping batch	43 vs ref	0.107	-1.336	-0.228	0.253	1.34552e-06	0.00361858	0.1285	0.8064
Genotyping batch	44 vs ref	0.066	-1.186	-0.325	0.052	0.00284322	0.00970069	0.0314164	0.95972
Genotyping batch	45 vs ref	0.07	-1.214	-0.27	0.202	0.00167452	0.00779272	0.0777861	0.843072
Genotyping batch	46 vs ref	0.09	-1.085	0.043	0.107	5.06317e-05	0.0177707	0.772266	0.91616
Genotyping batch	47 vs ref	0.102	-1.302	-0.231	0.322	4.22048e-06	0.00433999	0.150638	0.752451
Genotyping batch	48 vs ref	0.101	-1.128	-0.153	0.353	5.28111e-06	0.0135915	0.341837	0.730618
Genotyping batch	49 vs ref	0.071	-1.152	-0.168	0.356	0.00139098	0.011601	0.276745	0.726383
Genotyping batch	5 vs ref	0.078	-1.037	0.017	0.162	0.000459026	0.0229519	0.91463	0.873818
Genotyping batch	50 vs ref	0.111	-1.121	-0.298	0.295	5.26963e-07	0.0138861	0.0574166	0.772124
Genotyping batch	51 vs ref	0.071	-1.204	-0.048	-0.021	0.00143551	0.00877509	0.771863	0.983776
Genotyping batch	52 vs ref	0.066	-1.23	-0.265	0.139	0.00328376	0.00691012	0.0840181	0.891213
Genotyping batch	53 vs ref	0.062	-1.303	-0.175	0.191	0.00537329	0.00441902	0.28559	0.852075
Genotyping batch	54 vs ref	0.071	-1.076	-0.208	0.283	0.00127702	0.018565	0.184766	0.780913
Genotyping batch	55 vs ref	0.013	-1.148	-0.24	-0.342	0.559945	0.0118277	0.140264	0.737802
Genotyping batch	56 vs ref	0.04	-1.076	-0.161	-0.01	0.0696802	0.019528	0.337943	0.99208
Genotyping batch	57 vs ref	0.09	-1.148	-0.373	0.323	5.29881e-05	0.0121055	0.01718	0.750236
Genotyping batch	58 vs ref	0.078	-1.284	-0.145	0.126	0.000434416	0.00488853	0.344783	0.902008
Genotyping batch	59 vs ref	0.089	-1.31	-0.214	0.158	5.6179e-05	0.00443868	0.189815	0.877116
Genotyping batch	6 vs ref	0.055	-1.146	-0.316	0.314	0.0125242	0.012613	0.0509399	0.759621
Genotyping batch	60 vs ref	0.114	-1.316	-0.153	0.293	2.61225e-07	0.00410224	0.30075	0.774418
Genotyping batch	61 vs ref	0.068	-1.323	-0.227	0.176	0.00215228	0.00389301	0.160361	0.863769
Genotyping batch	62 vs ref	0.05	-1.26	-0.151	0.318	0.024623	0.00576241	0.347188	0.754032
Genotyping batch	63 vs ref	0.068	-1.205	-0.267	0.476	0.0021961	0.00862496	0.0868538	0.646373
Genotyping batch	64 vs ref	0.088	-1.142	-0.146	0.418	7.44427e-05	0.0127498	0.358121	0.680924
Genotyping batch	65 vs ref	0.06	-1.098	-0.104	0.411	0.00722457	0.0162674	0.501172	0.687132
Genotyping batch	66 vs ref	0.08	-1.15	-0.067	0.465	0.000302578	0.011677	0.664142	0.649276
Genotyping batch	67 vs ref	0.074	-1.102	-0.342	0.101	0.000793626	0.0160297	0.0297629	0.921442
Genotyping batch	68 vs ref	0.036	-1.075	-0.248	0.411	0.109327	0.0183102	0.110446	0.686256
Genotyping batch	69 vs ref	0.051	-1.195	-0.167	0.328	0.0212291	0.00886689	0.308441	0.745748
Genotyping batch	7 vs ref	0.077	-1.126	-0.316	0.23	0.00050458	0.0138704	0.0328087	0.822177
Genotyping batch	70 vs ref	0.08	-1.15	-0.275	0.317	0.000277843	0.0121581	0.101056	0.756793
Genotyping batch	71 vs ref	0.07	-1.311	-0.179	0.321	0.00178535	0.00412616	0.252447	0.754078
Genotyping batch	72 vs ref	0.103	-1.189	-0.223	-0.121	4.17602e-06	0.00925863	0.165118	0.905391
Genotyping batch	73 vs ref	0.093	-1.001	-0.208	-0.001	2.61425e-05	0.0281971	0.184285	0.999269
Genotyping batch	74 vs ref	0.059	-1.228	-0.117	0.018	0.0079337	0.00721433	0.476687	0.986005
Genotyping batch	75 vs ref	0.045	-1.12	-0.004	0.335	0.041995	0.0143184	0.98046	0.740522
Genotyping batch	76 vs ref	0.03	-1.085	-0.18	-0.187	0.178862	0.0186163	0.24392	0.855505
Genotyping batch	77 vs ref	0.042	-1.349	-0.255	0.06	0.0609764	0.00322759	0.105529	0.952757
Genotyping batch	78 vs ref	0.097	-1.132	-0.164	-0.07	1.18208e-05	0.0133129	0.2899	0.94678
Genotyping batch	79 vs ref	0.067	-1.235	-0.387	0.232	0.00241727	0.00688205	0.0147868	0.818723
Genotyping batch	8 vs ref	0.064	-1.07	-0.086	0.014	0.00353607	0.0192986	0.587132	0.989162
Genotyping batch	80 vs ref	0.097	-1.206	-0.279	0.769	1.21441e-05	0.00820757	0.0641825	0.45123
Genotyping batch	81 vs ref	0.054	-1.083	-0.18	0.29	0.014979	0.0182094	0.249448	0.775065
Genotyping batch	82 vs ref	0.072	-1.208	-0.128	0.175	0.0011016	0.00835564	0.41162	0.863004
Genotyping batch	83 vs ref	0.083	-1.223	-0.319	0.168	0.000153744	0.00757792	0.0558465	0.869652
Genotyping batch	84 vs ref	0.108	-1.263	-0.307	0.122	1.21535e-06	0.00597746	0.0504192	0.905176
Genotyping batch	85 vs ref	0.038	-1.096	-0.133	-0.026	0.081406	0.0170488	0.402263	0.979921
Genotyping batch	86 vs ref	0.093	-1.172	-0.322	0.208	2.83993e-05	0.0103909	0.0427434	0.838354
Genotyping batch	87 vs ref	0.066	-1.155	-0.066	0.097	0.00284747	0.0113712	0.655192	0.923732
Genotyping batch	88 vs ref	0.08	-1.252	-0.323	-0.05	0.000291908	0.00709545	0.039736	0.960979
Genotyping batch	89 vs ref	0.089	-1.176	0	0.121	5.85942e-05	0.0100869	0.999626	0.905534
Genotyping batch	9 vs ref	0.054	-1.116	-0.174	0.192	0.0149068	0.0141409	0.257008	0.850662
Genotyping batch	90 vs ref	0.061	-1.188	-0.082	-0.158	0.00569231	0.00938634	0.595023	0.876952
Genotyping batch	91 vs ref	0.081	-1.119	-0.083	0.225	0.000287905	0.0139004	0.578105	0.824231
Genotyping batch	92 vs ref	0.08	-1.171	-0.283	-0.427	0.000333968	0.0103358	0.0624968	0.67525
Genotyping batch	93 vs ref	0.034	-1.222	-0.103	-0.231	0.125768	0.00746194	0.509931	0.820789
Genotyping batch	94 vs ref	0.065	-1.275	-0.178	0.618	0.0198687	0.00606801	0.341061	0.548488
Genotyping batch	95 vs ref	0.082	-1.17	-0.133	0.347	0.000468388	0.0109503	0.397459	0.736188
Sex	Female (ref)	-0.001	0.121	0.057	0.041	0.79158	9.76172e-17	7.34303e-05	0.108064
Sex	Male vs ref	0.001	-0.228	-0.136	-0.123	0.700533	4.6461e-30	9.85149e-10	0.00550861
Supplements ever	No info (ref)	-0.041	-0.073	-0.014	-0.061	2.05395e-93	1.30024e-09	0.273225	0.0187388
Supplements ever	none vs ref	-0.078	-0.039	-0.192	-0.117	1.66069e-91	0.151672	8.81751e-11	0.0378382
Supplements ever	other vs ref	0.271	0.449	0.293	0.388	0	1.5732e-50	4.56643e-18	9.48257e-12
Supplements ever	vitD vs ref	0.312	0.663	0.45	0.631	3.0477e-243	5.79153e-32	2.48283e-10	2.16177e-06

## Sheet: E
Table E. 25OHD association with potential confounders fitted jointly
Associations with potential confounders were tested with linear regression (RINT 25OHD dependent variable for continuous and categorical independent variables), fitting all confounders jointly. NB: since wPCs were computed within each ancestry group, results should not be compared across ancestry groups. Abbreviations: AFR, African; beta, effect size estimate; EAS, East Asian; EUR, European; NA, …
	beta				se				P-value
Covariate	EUR	SAS	AFR	EAS	EUR	SAS	AFR	EAS	EUR	SAS	AFR	EAS
Age	0.00715417	0.0169667	0.0187134	0.0187414	0.000176844	0.00118303	0.00148183	0.00285445	0	4.35127e-46	3.9298e-36	6.79715e-11
Assessment centre 11002 vs. 11001	0.0801035	0.265594	0.0218583	-0.057302	0.0116967	0.0903844	0.117781	0.157916	7.4787e-12	0.00330741	0.852776	0.716751
Assessment centre 11003 vs. 11001	0.191317	0.0726032	-0.107083	-0.0126303	0.0114415	0.0955317	0.116089	0.183079	9.63589e-63	0.447282	0.356345	0.945007
Assessment centre 11004 vs. 11001	-0.169969	-0.0738865	-0.272263	-0.056567	0.0113491	0.0951645	0.186206	0.184679	1.08085e-50	0.43753	0.143745	0.759414
Assessment centre 11005 vs. 11001	-0.158098	0.00902641	-0.180473	0.0945134	0.0114982	0.142929	0.203505	0.166809	5.2207e-43	0.949646	0.375207	0.57106
Assessment centre 11006 vs. 11001	0.0407872	0.0982426	0.192985	0.236114	0.0109907	0.107419	0.142534	0.237321	0.000206406	0.360443	0.175797	0.319915
Assessment centre 11007 vs. 11001	0.134381	0.1293	0.10832	0.0601866	0.010206	0.0729695	0.0817532	0.139647	1.38742e-39	0.076436	0.18523	0.666527
Assessment centre 11008 vs. 11001	0.0372237	-0.00936141	-0.14607	0.0287921	0.0102127	0.0743672	0.0840165	0.155068	0.00026757	0.899829	0.0821561	0.852722
Assessment centre 11009 vs. 11001	-0.000661607	0.0448709	-0.0750616	-0.0560604	0.00994926	0.0900585	0.134032	0.162148	0.946981	0.618327	0.57548	0.729583
Assessment centre 11010 vs. 11001	0.0300562	-0.015804	-0.107717	-0.110141	0.00965015	0.0678008	0.0719105	0.150244	0.00184221	0.815694	0.134202	0.463607
Assessment centre 11011 vs. 11001	0.137719	0.208765	-0.0397788	0.175447	0.00973099	0.0773039	0.0785953	0.146865	1.84601e-45	0.00693627	0.612788	0.232399
Assessment centre 11012 vs. 11001	-0.0388601	0.19743	0.0859983	0.00533939	0.0126735	0.0764435	0.0620534	0.138495	0.00216782	0.00982053	0.165833	0.969251
Assessment centre 11013 vs. 11001	0.0806733	0.0705182	-0.132593	0.0119479	0.00997292	0.0753665	0.0781397	0.15449	6.02085e-16	0.349471	0.0897685	0.938364
Assessment centre 11014 vs. 11001	0.0847931	0.0781292	-0.0629544	-0.138463	0.0102529	0.0865624	0.0851287	0.174911	1.34183e-16	0.366777	0.459618	0.428688
Assessment centre 11016 vs. 11001	0.0942154	0.121818	0.0212224	-0.0604552	0.0100727	0.0899762	0.105062	0.149071	8.51994e-21	0.17581	0.839924	0.685126
Assessment centre 11017 vs. 11001	0.0925322	-0.0490797	-0.133029	-0.0454198	0.01075	0.102447	0.165399	0.22272	7.48622e-18	0.631899	0.421257	0.83843
Assessment centre 11018 vs. 11001	0.0990597	0.160659	0.039295	0.0474213	0.0106489	0.0606637	0.0630567	0.12866	1.38023e-20	0.00810409	0.533195	0.712486
Assessment centre 11020 vs. 11001	0.0534705	0.160537	0.033346	0.115194	0.010814	0.0639945	0.0587185	0.132977	7.63386e-07	0.0121404	0.570125	0.386459
Assessment centre 11021 vs. 11001	0.0359286	0.0243526	-0.144227	0.0762311	0.0108471	0.065291	0.062847	0.149245	0.000925476	0.709168	0.0217716	0.609571
Assessment centre 11022 vs. 11001	0.138911	-0.185907	-0.805411	-0.542111	0.0231244	0.226264	0.667239	0.476427	1.89006e-09	0.411307	0.227446	0.25533
Assessment centre 11023 vs. 11001	0.0847255	-0.128344	0.455366	0.48936	0.0400207	0.896419	0.944268	0.669255	0.034257	0.886157	0.62965	0.464754
Assessment month 10 vs. 1	0.729351	0.256536	0.460934	0.484888	0.00725946	0.0546226	0.0620153	0.114396	0	2.68959e-06	1.20333e-13	2.36494e-05
Assessment month 11 vs. 1	0.419523	0.157839	0.248644	0.169354	0.00725036	0.0540983	0.0592928	0.110409	0	0.00353668	2.78383e-05	0.125239
Assessment month 12 vs. 1	0.226591	0.0234664	0.228172	-0.0157907	0.00800593	0.0589001	0.0643808	0.127336	4.80369e-176	0.690339	0.000396766	0.901323
Assessment month 2 vs. 1	-0.0463146	-0.0181206	0.0290198	-0.0256164	0.00730963	0.0602035	0.0656214	0.116244	2.35896e-10	0.76343	0.658337	0.82561
Assessment month 3 vs. 1	-0.0318599	0.0574549	0.0963787	-0.0332287	0.00700651	0.0550025	0.0604344	0.111156	5.4385e-06	0.296244	0.110814	0.765023
Assessment month 4 vs. 1	0.105851	0.0311617	0.163013	0.0445503	0.00715131	0.0565982	0.0638551	0.11256	1.47512e-49	0.581939	0.0107074	0.692306
Assessment month 5 vs. 1	0.362138	0.223011	0.296235	0.15807	0.00696172	0.0531055	0.0579175	0.106412	0	2.7048e-05	3.23212e-07	0.137601
Assessment month 6 vs. 1	0.739209	0.394562	0.536384	0.495378	0.00700929	0.0512081	0.0573953	0.104963	0	1.46131e-14	1.23591e-20	2.55032e-06
Assessment month 7 vs. 1	0.955159	0.490167	0.666383	0.720754	0.00727049	0.0534132	0.0623441	0.11275	0	5.53466e-20	1.91297e-26	2.08486e-10
Assessment month 8 vs. 1	1.01075	0.522373	0.619789	0.660399	0.00751013	0.0559631	0.0675833	0.121015	0	1.28828e-20	6.20919e-20	5.52555e-08
Assessment month 9 vs. 1	0.958782	0.543266	0.792395	0.797891	0.00755198	0.059679	0.0725727	0.125742	0	1.08709e-19	1.63514e-27	2.81359e-10
BMI	-0.0346358	-0.0279007	-0.0123518	-0.027863	0.000298806	0.00228802	0.0022247	0.00656973	0	6.57339e-34	2.93481e-08	2.33964e-05
Genotyping batch -1 vs. -11	-0.00818764	-0.316998	-	-	0.0199206	0.59717	-	-	0.681062	0.595548	-	-
Genotyping batch -10 vs. -11	0.0207314	0.0138578	-	-	0.0198826	0.49695	-	-	0.297092	0.977754	-	-
Genotyping batch -2 vs. -11	0.00234566	-1.03751	-	-	0.0198541	0.649784	-	-	0.905953	0.110373	-	-
Genotyping batch -3 vs. -11	0.055042	0.786276	-	-	0.0198399	0.745678	-	-	0.00553219	0.29171	-	-
Genotyping batch -4 vs. -11	0.0263032	0.709655	-	-	0.0199151	0.56296	-	-	0.186579	0.207497	-	-
Genotyping batch -5 vs. -11	0.0235944	-0.0626964	-	-	0.0198889	0.975485	-	-	0.235501	0.948755	-	-
Genotyping batch -6 vs. -11	0.0104198	-0.0104042	-	-	0.0199569	0.651049	-	-	0.601591	0.98725	-	-
Genotyping batch -7 vs. -11	0.0318882	-0.566654	-	-	0.01985	0.650299	-	-	0.108174	0.383575	-	-
Genotyping batch -8 vs. -11	0.033006	0.0482432	-	-	0.0198631	0.539755	-	-	0.0965796	0.928782	-	-
Genotyping batch -9 vs. -11	0.0209299	0.159917	-	-	0.0198796	0.563974	-	-	0.292417	0.77676	-	-
Genotyping batch 1 vs. -11	0.0556298	-0.349973	-	-	0.0199351	0.410658	-	-	0.00526228	0.394114	-	-
Genotyping batch 10 vs. -11	0.0693417	-0.330369	-0.0473503	0.207256	0.0200865	0.409157	0.163408	0.304012	0.000556192	0.419438	0.772004	0.495494
Genotyping batch 11 vs. -11	0.056613	-0.434634	-0.100862	-0.00338239	0.0199668	0.410268	0.17555	0.343306	0.00457775	0.289453	0.565619	0.99214
Genotyping batch 12 vs. -11	0.0626426	-0.377573	-0.180839	-0.0602925	0.0199514	0.413475	0.157994	0.317952	0.00169102	0.36118	0.252419	0.849623
Genotyping batch 13 vs. -11	0.0785735	-0.243594	-0.167162	-0.158773	0.020009	0.408805	0.173014	0.341903	8.60584e-05	0.55128	0.333992	0.642432
Genotyping batch 14 vs. -11	0.0681002	-0.352193	-0.206704	-0.0270982	0.0199342	0.412544	0.163862	0.293147	0.000634961	0.393291	0.207192	0.92636
Genotyping batch 15 vs. -11	0.0565641	-0.337676	0.0237126	-0.161694	0.0199658	0.41201	0.1612	0.341825	0.00461084	0.412478	0.883058	0.636249
Genotyping batch 16 vs. -11	0.0707575	-0.282687	-0.272344	0.0572351	0.0201569	0.409652	0.156023	0.292278	0.000447575	0.490172	0.0809387	0.84477
Genotyping batch 17 vs. -11	0.0769682	-0.45911	0.00810594	0.0791147	0.0201391	0.410469	0.16295	0.321171	0.000132483	0.263386	0.960327	0.805454
Genotyping batch 18 vs. -11	0.0722337	-0.199438	0.281113	-0.24257	0.020056	0.411751	0.17396	0.290696	0.000316311	0.62814	0.106152	0.404142
Genotyping batch 19 vs. -11	0.091681	-0.286806	-0.223607	0.55841	0.0201461	0.412335	0.159366	0.322711	5.34557e-06	0.48672	0.160634	0.0837395
Genotyping batch 2 vs. -11	0.0710176	-0.478535	0.14755	0.219285	0.0200261	0.409483	0.170023	0.322461	0.0003908	0.242586	0.385523	0.496571
Genotyping batch 20 vs. -11	0.040644	-0.211352	-0.105428	0.329643	0.0201899	0.40943	0.158906	0.298108	0.0441063	0.605721	0.507061	0.268971
Genotyping batch 21 vs. -11	0.0651644	-0.340238	-0.0119741	0.118184	0.0202222	0.41037	0.155485	0.293145	0.00127124	0.407072	0.938617	0.686879
Genotyping batch 22 vs. -11	0.0818042	-0.311707	-0.0175157	0.156062	0.0200102	0.409582	0.161167	0.294174	4.34963e-05	0.446656	0.913459	0.595825
Genotyping batch 23 vs. -11	0.0578016	-0.206233	-0.0145219	0.342579	0.0200564	0.408978	0.168014	0.297908	0.00395235	0.61409	0.931125	0.250322
Genotyping batch 24 vs. -11	0.053126	-0.165217	-0.0326583	0.510609	0.0199966	0.410745	0.174899	0.335509	0.00789005	0.687519	0.85188	0.128215
Genotyping batch 25 vs. -11	0.0637808	-0.349382	-0.180232	-0.0928739	0.0200289	0.408372	0.163961	0.332667	0.00145043	0.392273	0.271705	0.780139
Genotyping batch 26 vs. -11	0.0756371	-0.397835	-0.212775	-0.0546787	0.0200659	0.410562	0.15821	0.342271	0.000163648	0.332573	0.178708	0.873094
Genotyping batch 27 vs. -11	0.0828224	-0.2726	-0.0184254	-0.0172908	0.0200779	0.409824	0.160736	0.298582	3.70731e-05	0.505965	0.908741	0.953827
Genotyping batch 28 vs. -11	0.0868708	-0.332296	-0.0666697	0.316534	0.0200028	0.41426	0.165798	0.320904	1.40628e-05	0.422494	0.687614	0.324081
Genotyping batch 29 vs. -11	0.0543635	-0.180772	-0.112551	0.0268347	0.0200044	0.411439	0.173184	0.316561	0.00657655	0.660409	0.515785	0.932454
Genotyping batch 3 vs. -11	0.0821494	-0.305363	0.0557899	0.087012	0.020005	0.410037	0.164786	0.326147	4.01867e-05	0.456463	0.734953	0.789664
Genotyping batch 30 vs. -11	0.0554822	-0.36107	-0.338729	-0.00421192	0.0200645	0.410306	0.16205	0.336928	0.00568906	0.378885	0.0366317	0.990027
Genotyping batch 31 vs. -11	0.0635162	-0.295222	0.0855773	0.36087	0.0199581	0.409587	0.170043	0.322096	0.00146032	0.471065	0.614792	0.262705
Genotyping batch 32 vs. -11	0.0896921	-0.352229	-0.0366343	0.222286	0.0200004	0.41147	0.161723	0.340931	7.31049e-06	0.392009	0.820801	0.514488
Genotyping batch 33 vs. -11	0.0566615	-0.105609	-0.180702	0.0919369	0.019967	0.412657	0.159369	0.309788	0.00454348	0.798016	0.256896	0.766674
Genotyping batch 34 vs. -11	0.0926682	-0.273354	0.104518	0.185931	0.0200354	0.412675	0.173078	0.313467	3.74299e-06	0.507736	0.545946	0.55316
Genotyping batch 35 vs. -11	0.035436	-0.276197	-0.35491	0.249856	0.020144	0.407958	0.162245	0.307399	0.0785551	0.49841	0.0287419	0.416439
Genotyping batch 36 vs. -11	0.0601116	-0.250073	-0.116861	0.517087	0.0200462	0.411011	0.17661	0.315653	0.00271198	0.542917	0.508193	0.101569
Genotyping batch 37 vs. -11	0.0584375	-0.372635	-0.145458	0.179009	0.0200443	0.410232	0.162139	0.315352	0.00355237	0.363719	0.36969	0.570346
Genotyping batch 38 vs. -11	0.078433	-0.377241	-0.097747	-0.149653	0.0200904	0.409621	0.165527	0.306614	9.46283e-05	0.357103	0.554864	0.625552
Genotyping batch 39 vs. -11	0.0439701	-0.371652	0.0560678	0.156798	0.0200534	0.412146	0.1686	0.316313	0.0283328	0.367217	0.739485	0.620165
Genotyping batch 4 vs. -11	0.0727154	-0.310388	-0.199918	0.316147	0.0200411	0.410389	0.163197	0.312699	0.000285308	0.449475	0.220615	0.312143
Genotyping batch 40 vs. -11	0.0596641	-0.364855	-0.00113212	0.0325197	0.0200094	0.410234	0.16781	0.332191	0.00286576	0.373824	0.994617	0.922027
Genotyping batch 41 vs. -11	0.097931	-0.407386	0.00942109	0.288079	0.0201669	0.410067	0.166749	0.297088	1.19817e-06	0.320514	0.954946	0.332342
Genotyping batch 42 vs. -11	0.0831372	-0.167927	0.0734135	0.175908	0.020146	0.409903	0.16427	0.296515	3.68014e-05	0.682056	0.654957	0.553088
Genotyping batch 43 vs. -11	0.0748541	-0.448671	-0.147835	0.0552578	0.0200122	0.412166	0.159419	0.341851	0.000183739	0.276376	0.353788	0.871606
Genotyping batch 44 vs. -11	0.0557247	-0.22018	-0.122356	0.0157865	0.0200233	0.412164	0.159951	0.341815	0.00538634	0.593214	0.444324	0.963169
Genotyping batch 45 vs. -11	0.0675046	-0.247839	-0.252944	0.0125393	0.0200768	0.409138	0.161296	0.316049	0.000773003	0.544692	0.116884	0.968357
Genotyping batch 46 vs. -11	0.0710081	-0.23407	0.204944	0.175662	0.0200916	0.410684	0.156769	0.318389	0.000409031	0.568726	0.191157	0.581209
Genotyping batch 47 vs. -11	0.0693976	-0.416812	0.0408304	0.272158	0.0201517	0.410613	0.168793	0.316534	0.000573742	0.31009	0.808868	0.390012
Genotyping batch 48 vs. -11	0.0616139	-0.325451	-0.128168	0.273764	0.0200324	0.409577	0.165472	0.342193	0.00210011	0.426867	0.438628	0.423804
Genotyping batch 49 vs. -11	0.0600335	-0.350895	-0.153384	0.174936	0.0200932	0.409289	0.163898	0.296579	0.00281056	0.39129	0.349384	0.555371
Genotyping batch 5 vs. -11	0.0741331	-0.192156	0.0907271	-0.047877	0.0201049	0.410331	0.160899	0.307247	0.00022666	0.639586	0.572859	0.876188
Genotyping batch 50 vs. -11	0.090575	-0.295851	-0.0687547	0.0858583	0.0199868	0.407524	0.1696	0.3225	5.85176e-06	0.467877	0.685202	0.790095
Genotyping batch 51 vs. -11	0.0641091	-0.419547	0.0679456	0.237932	0.0200543	0.412491	0.171722	0.387873	0.00138988	0.309133	0.69236	0.539673
Genotyping batch 52 vs. -11	0.070608	-0.347068	-0.139967	-0.0231696	0.020297	0.408052	0.158937	0.298658	0.000503841	0.395045	0.378543	0.938172
Genotyping batch 53 vs. -11	0.064306	-0.450457	-0.0774126	0.160964	0.0200923	0.410881	0.173763	0.331594	0.00137187	0.272972	0.655969	0.627435
Genotyping batch 54 vs. -11	0.043493	-0.264487	-0.0563856	0.1126	0.0200364	0.410916	0.168836	0.310924	0.0299546	0.51982	0.738415	0.717287
Genotyping batch 55 vs. -11	0.0726837	-0.20163	0.0634714	-0.13573	0.0200955	0.409346	0.170953	0.327373	0.000298162	0.622332	0.710442	0.678483
Genotyping batch 56 vs. -11	0.0581233	-0.361821	-0.112709	-0.15605	0.0201282	0.414246	0.177505	0.327918	0.00388156	0.382446	0.525474	0.634218
Genotyping batch 57 vs. -11	0.0484865	-0.431365	-0.239478	0.19519	0.0201125	0.410903	0.160245	0.299532	0.0159195	0.293842	0.135105	0.514712
Genotyping batch 58 vs. -11	0.0965104	-0.416743	-0.055251	-0.0456825	0.0200643	0.409376	0.163302	0.33094	1.50949e-06	0.30871	0.73512	0.890226
Genotyping batch 59 vs. -11	0.0782515	-0.582145	-0.0416389	0.131073	0.0199892	0.413719	0.168682	0.322305	9.05371e-05	0.159435	0.805033	0.684298
Genotyping batch 6 vs. -11	0.0740334	-0.115961	-0.124875	0.0840503	0.0199303	0.412898	0.171609	0.332654	0.000203533	0.778834	0.466841	0.800556
Genotyping batch 60 vs. -11	0.074134	-0.399296	-0.0869608	0.295873	0.0200899	0.411349	0.154783	0.315718	0.000224192	0.331727	0.574254	0.348814
Genotyping batch 61 vs. -11	0.071209	-0.449742	-0.125828	0.0734963	0.020063	0.41073	0.166799	0.338655	0.000386349	0.273556	0.450653	0.828215
Genotyping batch 62 vs. -11	0.0753971	-0.451933	-0.0335248	0.160845	0.0200361	0.409725	0.168663	0.298458	0.000167865	0.270053	0.842451	0.59001
Genotyping batch 63 vs. -11	0.0943463	-0.415025	-0.0894405	0.336058	0.0201197	0.411528	0.162227	0.356887	2.74305e-06	0.313246	0.581427	0.346509
Genotyping batch 64 vs. -11	0.0783846	-0.386806	0.102386	0.311068	0.0200733	0.410954	0.166795	0.313409	9.42732e-05	0.346611	0.539338	0.321075
Genotyping batch 65 vs. -11	0.0547357	-0.244063	-0.0503806	0.228399	0.0201071	0.410547	0.163893	0.327218	0.00648497	0.552206	0.758549	0.485268
Genotyping batch 66 vs. -11	0.0747571	-0.214842	-0.0683395	-0.0387455	0.0201134	0.408188	0.161596	0.325149	0.000201811	0.598673	0.672381	0.90516
Genotyping batch 67 vs. -11	0.0740354	-0.322505	-0.186694	0.0798372	0.0200505	0.410268	0.162302	0.350245	0.000222129	0.431841	0.250068	0.819714
Genotyping batch 68 vs. -11	0.0897151	-0.183491	-0.0725265	0.594749	0.020077	0.40816	0.15992	0.308219	7.87702e-06	0.653042	0.650191	0.0538129
Genotyping batch 69 vs. -11	0.0653122	-0.394917	-0.0661034	0.122281	0.0200915	0.4087	0.17099	0.28881	0.00115114	0.333935	0.699071	0.672058
Genotyping batch 7 vs. -11	0.0739978	-0.173688	-0.109437	-0.16152	0.020113	0.410548	0.154452	0.342835	0.000234096	0.67226	0.47863	0.637607
Genotyping batch 70 vs. -11	0.0628867	-0.324788	-0.19837	0.328732	0.0199989	0.410382	0.176569	0.350028	0.00166376	0.428718	0.261278	0.347778
Genotyping batch 71 vs. -11	0.0717189	-0.451319	-0.101519	0.0815931	0.0201536	0.410373	0.162087	0.322272	0.000372868	0.271461	0.531124	0.800158
Genotyping batch 72 vs. -11	0.0715646	-0.413689	-0.217105	-0.0949195	0.0201988	0.409573	0.168465	0.323446	0.000395625	0.312502	0.197539	0.769203
Genotyping batch 73 vs. -11	0.0863482	-0.210836	0.0276829	-0.185701	0.0200481	0.409229	0.169871	0.317866	1.65489e-05	0.606425	0.870552	0.559153
Genotyping batch 74 vs. -11	0.0505799	-0.272522	0.0431641	-0.187095	0.020042	0.410117	0.168015	0.298618	0.0116131	0.506391	0.797259	0.531044
Genotyping batch 75 vs. -11	0.0737855	-0.35594	-0.0417219	0.350877	0.0200758	0.409522	0.155998	0.287224	0.000237551	0.384786	0.78913	0.222017
Genotyping batch 76 vs. -11	0.0446873	-0.170112	-0.123715	-0.424696	0.0200697	0.414953	0.162827	0.343283	0.0259742	0.681849	0.447403	0.216192
Genotyping batch 77 vs. -11	0.0847687	-0.382247	-0.11408	-0.142256	0.0200765	0.41173	0.164355	0.317806	2.41901e-05	0.353231	0.487639	0.654484
Genotyping batch 78 vs. -11	0.0787666	-0.342891	-0.0134213	-0.0163065	0.0200179	0.409342	0.165489	0.375092	8.3276e-05	0.402243	0.935365	0.965329
Genotyping batch 79 vs. -11	0.0950576	-0.344265	-0.176635	0.228592	0.0201428	0.410802	0.163063	0.304034	2.3688e-06	0.402038	0.278746	0.452235
Genotyping batch 8 vs. -11	0.0565275	-0.304747	0.122061	-0.178667	0.0198894	0.410041	0.169093	0.322874	0.00448216	0.457375	0.470406	0.580085
Genotyping batch 80 vs. -11	0.0925342	-0.233396	-0.193054	0.426367	0.0199878	0.40878	0.155645	0.322179	3.66621e-06	0.568045	0.214892	0.185879
Genotyping batch 81 vs. -11	0.064022	-0.148185	-0.201443	0.0869838	0.0200218	0.41132	0.161998	0.295312	0.00138578	0.718657	0.213731	0.768373
Genotyping batch 82 vs. -11	0.0812351	-0.304315	-0.0248322	0.306603	0.0199551	0.41162	0.167073	0.30956	4.68431e-05	0.45974	0.88185	0.32209
Genotyping batch 83 vs. -11	0.0830934	-0.425517	-0.059506	0.118579	0.0199385	0.410632	0.174941	0.318141	3.08054e-05	0.300117	0.733756	0.709398
Genotyping batch 84 vs. -11	0.0780957	-0.41606	-0.290773	0.134284	0.0200885	0.412487	0.166814	0.32891	0.000101268	0.313167	0.0813641	0.683125
Genotyping batch 85 vs. -11	0.0242093	-0.188408	0.0468456	0.0174751	0.0199853	0.412165	0.168183	0.308088	0.22576	0.647598	0.780607	0.954774
Genotyping batch 86 vs. -11	0.0774565	-0.288976	-0.284916	0.163438	0.020053	0.411442	0.165501	0.324637	0.000112208	0.482482	0.0852014	0.614713
Genotyping batch 87 vs. -11	0.0562017	-0.285445	-0.00846543	0.148481	0.0200704	0.409534	0.153706	0.300841	0.00510696	0.485823	0.95608	0.621684
Genotyping batch 88 vs. -11	0.0845328	-0.5361	-0.0115004	-0.0314809	0.0200278	0.418731	0.167495	0.322443	2.43522e-05	0.200477	0.945261	0.922235
Genotyping batch 89 vs. -11	0.0683637	-0.26094	0.145754	-0.0760784	0.0200902	0.41021	0.15753	0.305294	0.000666961	0.52472	0.354874	0.803238
Genotyping batch 9 vs. -11	0.0583531	-0.276813	-0.0814706	-0.148895	0.0200486	0.407917	0.161196	0.307041	0.00360775	0.497411	0.613286	0.627782
Genotyping batch 90 vs. -11	0.08585	-0.257511	-0.0876777	-0.214373	0.0200925	0.410548	0.161221	0.332349	1.93133e-05	0.530522	0.586573	0.518996
Genotyping batch 91 vs. -11	0.0720661	-0.260125	0.0388052	0.360842	0.0202557	0.40766	0.15625	0.307921	0.00037399	0.52343	0.803869	0.24141
Genotyping batch 92 vs. -11	0.0775522	-0.314122	-0.23386	-0.258363	0.0201722	0.409396	0.160866	0.316044	0.000120815	0.442937	0.146061	0.413758
Genotyping batch 93 vs. -11	0.0512317	-0.278099	-0.0827963	-0.139525	0.0201531	0.409572	0.1656	0.310371	0.0110182	0.497158	0.617108	0.653096
Genotyping batch 94 vs. -11	0.0683252	-0.488671	-0.0293265	0.476024	0.025276	0.419103	0.190457	0.357289	0.00686852	0.243652	0.87763	0.182927
Genotyping batch 95 vs. -11	0.0882644	-0.314093	-0.074244	0.134605	0.0213274	0.412905	0.162078	0.347555	3.49583e-05	0.446863	0.646913	0.698587
wPC1	11.3603	-9.05439	0.671644	7.0755	0.687551	0.95516	0.487805	1.07919	2.63832e-61	3.28587e-21	0.1686	7.22751e-11
wPC10	6.72882	-0.356264	-0.423738	0.342582	0.463321	0.99763	0.964305	1.03045	8.91392e-48	0.721019	0.660369	0.739582
wPC2	-17.7902	19.5426	8.21205	1.82	0.779598	0.848999	1.0865	1.0772	3.47631e-115	1.20063e-113	4.65456e-14	0.0912884
wPC3	7.0149	-7.22868	-1.88436	2.63989	0.526429	0.951652	1.0394	0.963723	1.68044e-40	3.39425e-14	0.0698875	0.00621977
wPC4	-8.97532	-4.44802	-1.70955	3.12657	0.675503	0.913171	0.927534	1.05259	2.81463e-40	1.13144e-06	0.065358	0.00301472
wPC5	-0.41939	-2.44204	5.93212	-2.07296	0.196453	0.935435	0.878899	1.0371	0.0327768	0.00905521	1.61333e-11	0.0457836
wPC6	1.9305	3.65053	1.7268	-0.0501217	0.902662	1.04193	0.955972	1.06835	0.0324625	0.00046145	0.0709131	0.962586
wPC7	-1.21821	-0.477645	-3.2334	0.219148	0.314474	0.993927	0.934541	1.03959	0.000107163	0.63084	0.000543925	0.833066
wPC8	-10.3294	-0.170363	0.643776	0.983065	0.83528	1.00053	0.955716	1.05505	4.03336e-35	0.864801	0.500586	0.351581
wPC9	-6.77122	-0.457231	-2.04746	-0.669453	0.392861	1.0104	0.96172	1.0562	1.51743e-66	0.650904	0.0332953	0.526274
Sex Male vs. Female	0.0463697	-0.131242	-0.0692036	0.0647182	0.00296784	0.0206729	0.0247347	0.049334	5.18826e-55	2.29032e-10	0.00515991	0.189746
Supplement ever none vs. No info	-0.125614	-0.152729	-0.170814	-0.120422	0.0036663	0.0271728	0.0326308	0.0598491	7.0042e-257	1.96489e-08	1.70456e-07	0.0443625
Supplement ever other vs. No info	0.178861	0.249011	0.20961	0.347192	0.00387574	0.0299085	0.0365803	0.0593992	0	9.7426e-17	1.04889e-08	6.02106e-09
Supplement ever vitD vs. No info	0.22459	0.47627	0.37943	0.540155	0.00859115	0.0549343	0.0733477	0.135445	1.63408e-150	5.16416e-18	2.37286e-07	6.93608e-05
Time spent outdoors (summer)	0.0754895	0.0121576	0.00873391	0.0614608	0.000824184	0.00613489	0.00619328	0.0145787	0	0.0475455	0.158522	2.61518e-05
Time spent outdoors (winter)	-0.0254547	-0.00327155	-0.00746517	-0.0280147	0.00109008	0.00719295	0.00690308	0.0184601	1.6157e-120	0.649245	0.279548	0.129299
Use of sun protection	0.062895	0.0524133	0.0322795	0.026581	0.00160077	0.0103905	0.0121181	0.0215107	0	4.64889e-07	0.00774714	0.216731

## Sheet: F
Table F. Heritability and SNP-based heritability estimates
(a) Heritability and SNP-based heritability estimates
Heritability and SNP-based heritability estimates of RINT 25OHD were obtained using a method proposed by Zaitlen et al. 2013 (PMID 23737753) and implemented in GCTA (https://yanglab.westlake.edu.cn/software/gcta/#GREMLinfamilydata). The method estimates pedigree-based and SNP-based heritability simultaneously in one model. We used --make-bK 0.05. NB: Estimates for EUR are provided as reference an…
	Heritability		SNP-based heritability
Ancestry	Estimate	SE	Estimate	SE	P
EUR	0.32	0.011	0.13	0.009	4e-178
SAS	0.13274	0.070934	0.110461	0.041137	0.0021605
AFR	0.312492	0.054049	0.231457	0.050476	0
EAS	0.513805	0.252847	0.197755	0.176162	0.12701
(b) P-value of difference between estimates across ancestry groups
P-value of the Z-test difference between estimates in each ancestry pair (H0: difference = 0).
Group 1	Group 2	Heritability	SNP-based heritability
EUR	SAS	0.009	0.643
EUR	AFR	0.892	0.048
EUR	EAS	0.444	0.701
SAS	AFR	0.044	0.063
SAS	EAS	0.147	0.629
AFR	EAS	0.436	0.854

## Sheet: G
Table G. Independent associations identified with GCTA-COJO (conditional and joint) analysis applied to summary statistics of GWAS in non-European cohorts
Marginal association results from GWAS of 25OHD in SAS, AFR, EAS, and EUR for 3 SNPs identified to independently associate with 25OHD in GWAS of non-Europeans. NB1: rs146759773 was prioritised with COJO in AFR but was not tested in EUR, SAS or EAS since MAF<0.002 in those ancestry groups. NB2: Estimates for EUR are provided as reference and were obtained from the analysis presented in Revez et al…
						SAS						AFR						EAS						EUR
CHR	SNP	POS	A1	A2	Prioritised in	N	AF1	BETA	SE	P	r2	N	AF1	BETA	SE	P	r2	N	AF1	BETA	SE	P	r2	N	AF1	BETA	SE	P	r2
2	rs146759773	37533067	G	C	AFR	NA	4.2e-05	NA	NA	NA	NA	8306	0.0138454	0.356762	0.0627833	1.32797e-08	0.00347566	NA	4.2e-05	NA	NA	NA	NA	NA	4.2e-05	NA	NA	NA	NA
4	rs1352846	72617775	G	A	AFR	9983	0.287939	-0.105786	0.0142224	1.02244e-13	0.00458885	8306	0.0874067	-0.174287	0.0260182	2.10301e-11	0.00484598	2279	0.245502	-0.155353	0.0302915	2.91879e-07	0.00894092	417327	0.291433	-0.193471	0.00219074	0	0.015459
4	rs17467825	72605517	G	A	SAS	9983	0.288891	-0.10952	0.014207	1.26942e-14	0.00492819	8306	0.0680231	-0.10164	0.0291097	0.000480099	0.00130985	2279	0.253839	-0.151183	0.0298215	3.98686e-07	0.00865818	416442	0.29167	-0.192775	0.00219259	0	0.0153553

## Sheet: H
Table H. Association between predicted gene expression and 25OHD levels
Expression levels of nine genes were imputed using expression quantitative trait locus (eQTL) data from GTEx samples of sun-exposed skin (Aguet 2017 Nature). Specifically, polygenic scores (PGS) were computed as a weighted sum of trait-increasing alleles for UKB participants of inferred EUR ancestry. Weights were obtained by applying SBayesR (Lloyd-Jones 2019 Nat Commun) to the gene expression su…
Gene	BETA	SE	P
NDUFAF7	2.619	0.635	3.7e-05
QPCT	-0.171	0.043	7.2e-05
HEATR5B	0.347	0.104	0.0009
EIF2AK2	0.338	0.121	0.0051
GPATCH11	-0.096	0.037	0.0102
CEBPZ	-0.02	0.013	0.1285
PRKD3	-0.018	0.013	0.1665
CDC42EP3	-0.407	0.347	0.2416
STRN	-0.128	0.118	0.279

## Sheet: I
Table I. Association results in EUR and AFR for SNPs found to independently associate wit 25OHD in EUR
Association results in EUR and AFR for 114 SNPs found to independently associate wit 25OHD in EUR. NB: Of the 143 SNPs identified to independently associate with 25OHD in EUR (Revez et al. 2020; PMID 32242144), only 114 were also tested in AFR (MAF > 0.002) and had matching alleles. Abbreviations: A1, effect allele; A2, Other allele; AF1, Frequency of A1; AF1_diff, absolute difference between AF1…
					AFR					EUR
SNP	CHR	POS	A1	A2	N	AF1	BETA	SE	P	N	AF1	BETA	SE	P	BETA_diff	AF1_diff	beta_t	beta_t_p
rs116970203	11	14876718	A	G	8306	0.0266675	-0.0526139	0.0451003	0.243373	416792	0.027156	-0.376873	0.00612043	0	0.324259	0.0004885	0.779128	0.217952
rs61883501	11	13882754	C	A	8306	0.00529738	-0.242966	0.0994833	0.0145948	417580	0.033232	-0.00177085	0.00553993	0.749233	0.241195	0.0279346	2.43673	0.00741036
rs7604788	2	21190024	T	C	8306	0.00355165	0.243934	0.122668	0.0467488	415067	0.033433	0.0336737	0.0055518	1.31652e-09	0.21026	0.0298814	-1.95286	0.0254179
rs13060130	3	84440527	T	C	8306	0.0143872	0.14321	0.0611	0.019085	416608	0.139689	-0.0149893	0.00287224	1.80208e-07	0.158199	0.125302	-2.35627	0.00922984
rs77532868	10	88081438	T	C	8306	0.00499639	0.175143	0.103574	0.0908396	417580	0.054042	0.0265692	0.00440069	1.56497e-09	0.148574	0.0490456	-1.6629	0.0481662
rs2762943	20	52790786	T	G	8306	0.00993258	0.0711754	0.0729323	0.329109	417580	0.076929	-0.0457231	0.00373798	2.09661e-34	0.116899	0.0669964	-1.02035	0.15378
rs61816761	1	152285861	A	G	8306	0.00252829	0.0179222	0.14524	0.901793	407639	0.015926	0.12315	0.00804767	7.35099e-53	0.105228	0.0133977	-5.81434e-05	0.499977
rs12803256	11	71132868	G	A	8306	0.20124	0.000511103	0.0180237	0.977377	413333	0.776732	0.104243	0.00239998	0	0.103732	0.575492	0.0761338	0.469656
rs140371183	1	152098428	G	A	8306	0.00288948	-0.0108889	0.135909	0.936143	414444	0.032179	0.0870147	0.00565335	1.86093e-53	0.0979036	0.0292895	0.167065	0.43366
rs2207132	20	39142516	A	G	8306	0.00216711	0.0582165	0.15262	0.702872	417580	0.03289	-0.0345955	0.00557773	5.55971e-10	0.092812	0.0307229	-0.415788	0.338782
rs2229742	21	16339172	C	G	8306	0.00975199	0.0470244	0.0744955	0.527885	417580	0.103451	-0.0251483	0.00327069	1.48299e-14	0.0721727	0.093699	-0.655779	0.255983
rs4364259	4	15892159	A	G	8306	0.0221527	-0.0536205	0.0490965	0.274769	408470	0.202148	0.0159119	0.00250595	2.15807e-10	0.0695324	0.179995	1.10664	0.134225
rs78151190	6	25619007	C	A	8306	0.0164339	0.0507132	0.0571356	0.374759	415165	0.128716	-0.0168754	0.00297406	1.39336e-08	0.0675886	0.112282	-0.903269	0.183192
rs13284054	9	107669073	C	T	8306	0.142608	-0.0461146	0.0210821	0.0287144	405247	0.117727	0.0175688	0.00313411	2.07456e-08	0.0636834	0.024881	2.18117	0.0145853
rs17216707	20	52732362	C	T	8306	0.0480978	0.0235873	0.0339644	0.487386	398578	0.182684	-0.0376264	0.00263713	3.46579e-46	0.0612137	0.134586	-0.730014	0.232691
rs8091117	18	28919794	A	C	8306	0.475199	0.0341626	0.0144708	0.0182357	417580	0.065298	-0.0263626	0.0040284	5.98203e-11	0.0605252	0.409901	-2.30068	0.0107049
rs1660839	11	71094232	A	G	8306	0.235914	-0.029084	0.0170849	0.0886957	416363	0.248849	0.0292665	0.00230557	6.39659e-37	0.0583505	0.012935	1.7163	0.0430539
rs12123821	1	152179152	T	C	8306	0.00571876	0.134784	0.0968828	0.164162	417580	0.047527	0.0785529	0.00467652	2.55357e-63	0.0562311	0.0418082	-1.31104	0.0949228
rs12794714	11	14913575	A	G	8306	0.1281	-0.0323554	0.0215122	0.132569	416823	0.421803	-0.0878964	0.00201629	0	0.055541	0.293703	1.40959	0.0793305
rs2725371	8	30854033	A	G	8306	0.0969179	-0.0667784	0.0244057	0.00621566	411425	0.302309	-0.0118392	0.00218287	5.83788e-08	0.0549392	0.205391	2.71346	0.00332921
rs115621755	22	50853134	T	C	8306	0.22556	0.042125	0.0175113	0.0161461	416287	0.32712	-0.0124309	0.00212296	4.75603e-09	0.0545559	0.10156	-2.40053	0.00818557
rs6003456	22	23356100	A	T	8306	0.180653	0.0393217	0.0188504	0.0369801	411906	0.234664	-0.013277	0.00236378	1.94497e-08	0.0525987	0.054011	-2.08306	0.0186231
rs7412	19	45412079	T	C	8306	0.114616	0.0760694	0.0230471	0.00096476	417580	0.082073	0.0300485	0.00363434	1.36311e-16	0.0460209	0.032543	-3.23027	0.000618367
rs2346264	7	133536351	A	C	8306	0.0223935	0.0593564	0.0491204	0.226899	410103	0.217315	0.0138826	0.00243596	1.20495e-08	0.0454738	0.194921	-1.19302	0.116431
rs2074735	22	31535872	C	G	8306	0.0128823	-0.0158341	0.0641078	0.804914	417580	0.064096	0.0278196	0.00407045	8.22711e-12	0.0436537	0.0512137	0.274315	0.391921
rs12372115	12	97982701	T	G	8306	0.0172767	-0.064812	0.0560006	0.247132	417314	0.070719	-0.0217954	0.00387948	1.93054e-08	0.0430166	0.0534423	1.13278	0.128653
rs9490317	6	121859499	C	T	8306	0.291777	-0.0317276	0.0160721	0.0483729	411732	0.445894	0.011051	0.00201182	3.95071e-08	0.0427786	0.154117	1.96984	0.0244281
rs964184	11	116648917	G	C	8306	0.21027	-0.00381875	0.0178711	0.830794	417580	0.131624	-0.0431755	0.00294423	1.08882e-48	0.0393568	0.078646	0.167665	0.433423
rs10908419	1	154567699	A	G	8306	0.132856	0.0241305	0.0212911	0.257062	417162	0.489933	-0.012342	0.00199206	5.80717e-10	0.0364725	0.357077	-1.14077	0.126982
rs72997623	11	75488054	A	C	8306	0.0411751	-0.00857081	0.0366105	0.814901	415968	0.084662	0.0276158	0.00358139	1.24921e-14	0.0361866	0.0434869	0.260612	0.397196
rs10426	19	51517798	A	G	8306	0.129304	-0.00895081	0.0217318	0.68043	417580	0.213433	0.0256629	0.00243056	4.64391e-26	0.0346137	0.084129	0.434987	0.331786
rs55829990	15	63790642	C	T	8306	0.0439441	0.0159273	0.034801	0.647192	414042	0.344004	-0.0186013	0.00210294	9.1235e-19	0.0345286	0.30006	-0.475436	0.317238
rs6671730	1	2339139	A	G	8306	0.302733	0.0196018	0.0158652	0.216636	415405	0.434286	-0.0147881	0.00201077	1.91753e-13	0.0343899	0.131553	-1.2405	0.107394
rs2248551	6	131924689	A	G	8306	0.136648	-0.0576341	0.0210912	0.00628331	416984	0.165222	-0.0233623	0.0026823	3.04428e-18	0.0342718	0.028574	2.68742	0.00360035
rs11108368	12	96386138	A	G	8306	0.252408	-0.0378503	0.0166906	0.0233436	396937	0.393855	-0.00383068	0.00209129	0.0669906	0.0340196	0.141447	2.24634	0.0123412
rs17231506	16	56994528	T	C	8306	0.136528	0.0142564	0.0210854	0.498959	417078	0.323106	-0.0184236	0.00213148	5.44805e-18	0.03268	0.186578	-0.691122	0.244744
rs3814995	19	36342212	T	C	8306	0.0611004	0.0192143	0.030038	0.522389	417580	0.311595	-0.012558	0.00214992	5.18357e-09	0.0317723	0.250495	-0.650592	0.257655
rs10859995	12	96375682	C	T	8306	0.343727	-0.00869631	0.0155264	0.575411	417580	0.582634	-0.0403465	0.0020206	1.05514e-88	0.0316502	0.238907	0.515068	0.303253
rs13104260	4	70348090	A	G	8306	0.115218	-0.0230705	0.0229409	0.314583	414983	0.256938	0.00725311	0.00228347	0.00149138	0.0303236	0.14172	1.00796	0.156737
rs9861009	3	141654685	T	C	8306	0.304539	0.0161637	0.0160225	0.313065	411690	0.272485	-0.0140213	0.00225294	4.8595e-10	0.030185	0.032054	-1.01301	0.155529
rs613808	11	116710968	G	A	8306	0.147905	-0.00360979	0.0203519	0.859219	409404	0.719993	0.0264476	0.00223913	3.40237e-32	0.0300574	0.572088	0.202752	0.419664
rs35408430	1	17560195	T	C	8306	0.478389	0.00832503	0.0145752	0.567878	416366	0.342194	-0.0214952	0.00209979	1.35578e-24	0.0298202	0.136195	-0.586836	0.278657
rs62007299	15	77711719	A	G	8306	0.492235	0.0163341	0.0146184	0.263836	416920	0.712537	-0.0133407	0.00219977	1.32294e-09	0.0296748	0.220302	-1.11827	0.131727
rs705117	4	72608115	T	C	8306	0.227546	-0.00419047	0.0171939	0.807449	416839	0.8523	-0.0334179	0.00280601	1.05768e-32	0.0292274	0.624754	0.207118	0.417959
rs4418728	10	94839724	T	G	8306	0.264929	-0.0174087	0.0163858	0.288044	417121	0.451688	0.0109611	0.00200006	4.24366e-08	0.0283698	0.186759	1.06556	0.143311
rs1260326	2	27730940	T	C	8306	0.126234	0.00586774	0.0217957	0.787764	417580	0.393435	-0.0206128	0.00203644	4.4161e-24	0.0264805	0.267201	-0.288661	0.38642
rs261291	15	58680178	C	T	8306	0.451481	-0.00123314	0.0145466	0.932443	416031	0.355228	-0.0273653	0.00208561	2.49549e-39	0.0261322	0.096253	0.0565483	0.477453
rs12056768	8	116988527	T	G	8306	0.187756	0.0480543	0.0187186	0.0102526	414768	0.417091	0.0234029	0.00202418	6.44269e-31	0.0246514	0.229335	-2.52891	0.00572082
rs78649910	4	3482213	A	T	8306	0.116	0.00285175	0.0226652	0.899874	411070	0.106179	-0.0211949	0.00325203	7.15153e-11	0.0240466	0.009821	-0.14574	0.442063
rs8018720	14	39556185	G	C	8306	0.146039	0.0139348	0.0204423	0.495451	417580	0.176673	0.0378247	0.00260904	1.25516e-47	0.0238899	0.030634	-0.638355	0.261621
rs10887718	10	82042624	T	C	8306	0.435589	0.0118343	0.0147057	0.420966	415177	0.528213	-0.0111219	0.00199828	2.61078e-08	0.0229562	0.092624	-0.808536	0.209391
rs4738684	8	59393273	A	G	8306	0.0588129	0.0101907	0.0308856	0.741438	414719	0.334478	-0.0124102	0.00211491	4.41277e-09	0.0226009	0.275665	-0.341589	0.36633
rs78168201	11	70971149	T	C	8306	0.00589935	0.11112	0.0954058	0.244139	407632	0.013766	0.0893469	0.00864963	5.17976e-25	0.0217731	0.00786665	-1.0706	0.142174
rs2037511	18	61366207	A	G	8306	0.0743438	-0.00357674	0.0276937	0.897236	417492	0.166007	0.0181228	0.00267963	1.35001e-11	0.0216995	0.0916632	0.146676	0.441694
rs4327060	16	72807438	C	T	8306	0.428124	0.00318045	0.0145421	0.826879	417580	0.945604	0.0243589	0.00439221	2.92387e-08	0.0211785	0.51748	-0.185006	0.426612
rs6782190	3	85639672	A	G	8306	0.375271	0.00391559	0.0149898	0.793924	416911	0.647512	-0.0172156	0.00208415	1.45355e-16	0.0211312	0.272241	-0.275944	0.391296
rs11606	19	54658102	G	C	8306	0.124789	-0.00867604	0.0219497	0.692645	402410	0.425162	0.0120363	0.00205119	4.41237e-09	0.0207123	0.300373	0.405591	0.342522
rs1352846	4	72617775	G	A	8306	0.0874067	-0.174287	0.0260182	2.10301e-11	417327	0.291433	-0.193471	0.00219074	0	0.019184	0.204026	6.48157	4.53877e-11
rs804281	8	11611865	A	G	8306	0.201059	-0.0319829	0.0180925	0.0771039	416585	0.416395	-0.0132996	0.00202139	4.72191e-11	0.0186833	0.215336	1.74351	0.040622
rs7528419	1	109817192	G	A	8306	0.272875	0.00110562	0.0162869	0.945878	417580	0.224671	0.0197401	0.00238729	1.35246e-16	0.0186345	0.048204	-0.0474262	0.481087
rs142158911	19	11190534	A	G	8306	0.205514	0.00734686	0.0180462	0.683925	412939	0.114608	0.0255317	0.00314553	4.78468e-16	0.0181848	0.090906	-0.375535	0.353631
rs28692966	8	25892919	A	G	8306	0.47881	0.0328365	0.0145618	0.0241352	413976	0.252936	0.0148311	0.00230018	1.13479e-10	0.0180054	0.225874	-2.21253	0.0134651
rs541041	2	21294975	A	G	8306	0.411209	0.00082368	0.0146502	0.955164	417580	0.819239	-0.0154585	0.00258635	2.27374e-09	0.0162822	0.40803	-0.0708254	0.471768
rs590215	18	57904088	T	C	8306	0.172405	0.00330416	0.019163	0.863104	415836	0.265927	-0.0129217	0.00225753	1.0417e-08	0.0162259	0.093522	-0.184161	0.426943
rs727857	2	58981967	G	A	8306	0.429208	-0.00214655	0.0146317	0.883364	409686	0.388511	0.0140184	0.00206152	1.04611e-11	0.016165	0.040697	0.159289	0.436721
rs4121823	18	47144223	T	A	8306	0.128943	0.0353166	0.0217838	0.104968	410711	0.154667	0.0192879	0.00277797	3.83351e-12	0.0160287	0.025724	-1.58892	0.0560392
rs34290760	8	9185179	G	C	8306	0.00517698	-0.0178495	0.100595	0.859164	415951	0.029112	-0.0334615	0.00593241	1.69588e-08	0.015612	0.023935	0.14367	0.442881
rs10454087	17	40735641	T	C	8306	0.202083	-0.0288712	0.0181625	0.111923	417361	0.284822	-0.0135306	0.00220667	8.69579e-10	0.0153406	0.082739	1.56447	0.0588536
rs11076175	16	57006378	G	A	8306	0.25596	0.00835062	0.0167302	0.617685	416093	0.178358	0.0230493	0.00260705	9.47513e-19	0.0146987	0.077602	-0.470133	0.31913
rs1149605	11	76485216	C	T	8306	0.102035	0.00743083	0.0241207	0.75803	413532	0.170397	0.0220166	0.00266133	1.30877e-16	0.0145858	0.068362	-0.284194	0.388131
rs6123359	20	52714706	G	A	8306	0.0741633	0.0479621	0.0278407	0.0849371	409801	0.102225	0.0341831	0.00331429	6.09972e-25	0.013779	0.0280617	-1.67647	0.0468229
rs12317268	12	21352541	G	A	8306	0.18294	-0.00729999	0.0190419	0.701449	415450	0.151004	-0.0208967	0.00278474	6.18861e-14	0.0135967	0.031936	0.358433	0.36001
rs73413596	12	111582630	T	C	8306	0.268541	-0.00825995	0.0162674	0.611621	413966	0.926146	-0.0216996	0.00382584	1.41262e-08	0.0134396	0.657605	0.472576	0.318258
rs3849374	2	101443397	G	C	8306	0.341982	0.0281302	0.0151602	0.0635203	412178	0.821971	0.0161021	0.00261564	7.45735e-10	0.0120281	0.479989	-1.81241	0.0349613
rs7522116	1	41835685	T	C	8306	0.29864	-0.00215063	0.0158747	0.892237	411594	0.566233	-0.0134641	0.00202533	2.97438e-11	0.0113135	0.267593	0.120922	0.451876
rs2952289	17	66464414	C	T	8306	0.29262	-0.00648944	0.0160636	0.686224	413003	0.201968	-0.017715	0.00249217	1.17512e-12	0.0112256	0.090652	0.381493	0.351419
rs2131925	1	63025942	T	G	8306	0.320612	-0.0341571	0.0155047	0.0275938	417580	0.643625	-0.0229402	0.0020845	3.6108e-28	0.0112169	0.323013	2.16043	0.0153696
rs484195	19	45421877	A	G	8306	0.0952324	0.0264438	0.0245827	0.282058	399120	0.384386	0.0155156	0.00209699	1.37248e-13	0.0109282	0.289154	-1.0563	0.145416
rs10070734	5	87940026	C	T	8306	0.455093	0.00285434	0.014548	0.844452	415505	0.709531	0.0132137	0.00219753	1.82138e-09	0.0103594	0.254438	-0.180787	0.428267
rs4616820	4	57745481	C	T	8306	0.39038	0.00199546	0.0150733	0.894681	409145	0.535046	0.012286	0.00201755	1.13209e-09	0.0102905	0.144666	-0.118928	0.452666
rs72834856	6	22801858	G	T	8306	0.00854804	-0.0351818	0.0794714	0.657985	415915	0.072064	-0.0249871	0.00385103	8.67359e-11	0.0101947	0.063516	0.417192	0.338269
rs2847500	11	120114421	A	G	8306	0.261137	-0.0119075	0.0165962	0.473075	417580	0.123503	-0.021925	0.00302751	4.42372e-13	0.0100175	0.137634	0.68391	0.247016
rs7784802	7	64015379	T	A	8306	0.443294	0.00380849	0.0145687	0.793772	417239	0.360991	0.0138131	0.00207209	2.6243e-11	0.0100046	0.082303	-0.244998	0.403229
rs11264322	1	155087933	A	G	8306	0.337888	0.000325673	0.0154354	0.983167	411741	0.429765	-0.00938478	0.0020223	3.47338e-06	0.00971045	0.091877	-0.0303051	0.487912
rs11127186	2	28881407	C	T	8306	0.334517	0.0206013	0.0153417	0.179328	400133	0.495795	0.0109023	0.00203379	8.29504e-08	0.009699	0.161278	-1.32028	0.0933704
rs10085881	7	21577960	C	T	8306	0.0802432	-0.00493678	0.0267372	0.853511	407826	0.282185	-0.0145575	0.00223829	7.82932e-11	0.00962072	0.201942	0.16944	0.432725
rs1038165	12	68665940	C	T	8306	0.36877	-0.00275598	0.015046	0.854665	417036	0.416651	-0.0120567	0.002018	2.30681e-09	0.00930072	0.047881	0.169488	0.432706
rs11732896	4	88287993	G	A	8306	0.460571	0.00676208	0.0145579	0.642292	417580	0.701209	0.0160047	0.00217341	1.78673e-13	0.00924262	0.240638	-0.443399	0.328738
rs1933064	1	152301576	G	A	8306	0.196364	-0.00669609	0.0182147	0.713156	402787	0.53039	-0.015731	0.00203195	9.79928e-15	0.00903491	0.334026	0.349623	0.363311
rs325384	15	100229761	T	C	8306	0.0537563	-0.00518386	0.03196	0.87115	413731	0.284205	-0.0141728	0.00221789	1.65666e-10	0.00898894	0.230449	0.147636	0.441315
rs28374650	6	32623367	T	C	8306	0.309174	-0.00537719	0.0157001	0.731979	415389	0.243562	-0.0135623	0.00232502	5.43783e-09	0.00818511	0.065612	0.325237	0.372501
rs31612	5	108996643	C	T	8306	0.118408	-0.00634582	0.0223215	0.776187	410035	0.174438	-0.014528	0.00264902	4.1516e-08	0.00818218	0.05603	0.267783	0.394433
rs6672758	1	230303512	T	C	8306	0.243378	0.00964471	0.0169366	0.569044	410721	0.800872	0.0175857	0.00250898	2.39843e-12	0.00794099	0.557494	-0.545726	0.292627
rs7149014	14	29802911	C	T	8306	0.380327	-0.00538879	0.0153932	0.726282	407568	0.629193	-0.0129475	0.00208615	5.42038e-10	0.00755871	0.248866	0.333957	0.369206
rs61891388	11	66079818	G	T	8306	0.156152	0.00533979	0.0201834	0.791345	414310	0.455921	0.0125532	0.00200799	4.06256e-10	0.00721341	0.299769	-0.250711	0.401019
rs867772	1	220972343	A	G	8306	0.0735613	0.00826938	0.0276355	0.764764	413656	0.315487	0.0146031	0.00215141	1.13946e-11	0.00633372	0.241926	-0.283725	0.388311
rs77924615	16	20392332	A	G	8306	0.0494221	-0.010879	0.0332392	0.743445	407680	0.193485	-0.0166321	0.00255158	7.10842e-11	0.0057531	0.144063	0.309702	0.378394
rs76798800	1	154994978	T	G	8306	0.186431	-0.00673935	0.0186798	0.718262	414922	0.266255	-0.0121989	0.00225962	6.71428e-08	0.00545955	0.079824	0.345973	0.364682
rs10908465	1	155389688	T	C	8306	0.160426	0.0115463	0.0198733	0.561245	416638	0.267332	0.0168816	0.00224924	6.11984e-14	0.0053353	0.106906	-0.560428	0.287594
rs2585442	20	52737123	G	C	8306	0.0676017	0.0303478	0.0289584	0.294649	400363	0.240654	0.0356675	0.00237687	6.69916e-51	0.0053197	0.173052	-1.0088	0.156535
rs4575545	16	79755446	A	G	8306	0.203889	-0.0103266	0.0180027	0.566227	412611	0.304828	-0.0155823	0.00217312	7.47345e-13	0.0052557	0.100939	0.553898	0.289824
rs2012736	2	234622379	A	C	8306	0.104322	-0.0430994	0.0238675	0.0709524	415119	0.080814	-0.0483073	0.00366555	1.16335e-39	0.0052079	0.023508	1.73654	0.0412339
rs1047891	2	211540507	A	C	8306	0.359559	-0.0102471	0.0149658	0.493532	417580	0.315821	-0.0152142	0.00214041	1.17651e-12	0.0049671	0.043738	0.66259	0.253797
rs6966728	7	104618318	C	T	8306	0.208343	0.00725969	0.0178815	0.684751	400410	0.537368	0.0117532	0.00203758	8.01092e-09	0.00449351	0.329025	-0.391625	0.347668
rs11182428	12	38526387	C	T	8306	0.222369	-0.00876835	0.0174553	0.615433	416925	0.519995	-0.0125352	0.00199379	3.23412e-10	0.00376685	0.297626	0.486551	0.313288
rs11542462	16	82033810	A	G	8306	0.0153503	-0.026511	0.0587752	0.651949	417580	0.134344	-0.023334	0.00291776	1.27242e-15	0.003177	0.118994	0.427169	0.334628
rs7569755	2	118648261	A	G	8306	0.419215	0.0111237	0.0147038	0.449339	410139	0.29058	0.01425	0.00221206	1.17937e-10	0.0031263	0.128635	-0.73385	0.23152
rs75741381	7	100809458	G	C	8306	0.38123	-0.0135567	0.0148074	0.35991	412004	0.147638	-0.0166065	0.00282521	4.15283e-09	0.0030498	0.233592	0.882706	0.188698
rs9476310	6	57767576	C	T	8306	0.278413	-0.00971274	0.016093	0.54615	414844	0.488637	-0.0117571	0.00200093	4.20824e-09	0.00204436	0.210224	0.587169	0.278545
rs3925446	10	91495322	A	G	8306	0.024079	0.0171621	0.047256	0.716475	416117	0.199129	0.0152166	0.00249607	1.08604e-09	0.0019455	0.17505	-0.347451	0.364126
rs2710651	2	63166379	G	A	8306	0.369733	0.00980974	0.0149877	0.512777	416172	0.471877	0.0114568	0.00199623	9.51095e-09	0.00164706	0.102144	-0.637333	0.261954
rs8113404	19	53065579	T	C	8306	0.431616	0.0116469	0.0146832	0.427653	413992	0.304586	0.012173	0.00217136	2.06833e-08	0.0005261	0.12703	-0.772506	0.219907
rs212100	19	48376995	T	C	8306	0.0168553	0.0666622	0.0570792	0.242851	416419	0.164001	0.0661522	0.00269018	1.60431e-133	0.00051	0.147146	-1.10044	0.13557
rs1800588	15	58723675	C	T	8306	0.473333	0.032896	0.0146212	0.0244568	417580	0.784797	0.0329215	0.00242187	4.38214e-42	2.55e-05	0.311464	-2.18672	0.0143816

## Sheet: J
Table J. Association results for variants with large difference in effect size estimate, but not allele frequency
Associations with 25OHD for (1) variants that had a large difference between effect size estimates in EUR and AFR, but not allele frequency (first row in each LD pair – variants highlighted in Figure H in S1 Appendix, panel B), and (2) the SNP with strongest LD r2 in EUR (second row in each LD pair). Columns are: SNP, variant rs ID; CHR, chromosome; POS, base pair position; A1, effect allele; A2,…
						EUR					AFR							LD r2
LD pair	SNP	CHR	POS	A1	A2	N	AF1	BETA	SE	P	N	AF1	BETA	SE	P	BETA_diff	AF1_diff	EUR	AFR
1	rs116970203	11	14876718	A	G	416792	0.027156	-0.376873	0.00612043	0	8306	0.0266675	-0.0526139	0.0451003	0.243373	0.324259	-0.0004885	0.999055	0.0534096
1	rs117913124	11	14900931	A	G	416571	0.026974	-0.377198	0.00614312	0	8306	0.00216711	-0.365722	0.15682	0.0196951	0.011476	-0.0248069
2	rs61883501	11	13882754	C	A	417580	0.033232	-0.00177085	0.00553993	0.749233	8306	0.00529738	-0.242966	0.0994833	0.0145948	-0.241195	-0.0279346	0.69781	–
2	rs61883496	11	13842900	C	T	408948	0.963773	0.0151734	0.00538574	0.00484252	–	–	–	–	–	–	–
3	rs7604788	2	21190024	T	C	415067	0.033433	0.0336737	0.0055518	1.31652e-09	8306	0.00355165	0.243934	0.122668	0.0467488	0.21026	-0.0298813	0.900664	0.922813
3	rs141970801	2	21152755	A	G	415171	0.038413	0.0301804	0.00519136	6.11454e-09	8306	0.00385264	0.233351	0.117815	0.0476299	0.203171	-0.0345604
4	rs77532868	10	88081438	T	C	417580	0.054042	0.0265692	0.00440069	1.56497e-09	8306	0.00499639	0.175143	0.103574	0.0908396	0.148574	-0.0490456	0.966883	0.878034
4	rs2607863	10	88024443	T	C	416376	0.0542394	0.0255465	0.00439922	6.35795e-09	8306	0.0048158	0.177584	0.105479	0.0922599	0.152037	-0.0494236
5	rs2762943	20	52790786	T	G	417580	0.076929	-0.0457231	0.00373798	2.09661e-34	8306	0.00993258	0.0711754	0.0729323	0.329109	0.116899	-0.0669964	0.614673	0.64906
5	rs2762942	20	52788925	G	A	417580	0.0545452	-0.0539922	0.00438314	7.2318e-35	8306	0.00692271	0.0210222	0.0873963	0.809913	0.0750144	-0.0476225
6	rs61816761	1	152285861	A	G	407639	0.015926	0.12315	0.00804767	7.35099e-53	8306	0.00252829	0.0179222	0.14524	0.901793	-0.105228	-0.0133977	0.690674	–
6	rs61815559	1	152271219	A	T	412963	0.968578	-0.0861888	0.00573219	4.2698e-51	–	–	–	–	–	–	–

[truncated: 19 more sheets: K, L, M, N, O, P, Q, R, S, T, U, V, W, X, Y, Z, AA, AB, AC]
